# Supplementary material for: Enhancing oral squamous cell carcinoma prediction: the prognostic power of the worst pattern of invasion and the limited impact of molecular resection margins
Source: Front Oncol. 2023 Dec 22;13:1287650. doi: 10.3389/fonc.2023.1287650 (PMC10766711; doi:10.3389/fonc.2023.1287650)
Supplement: Supplementary file 7 [file Table_5.xlsx]

## Sheet: S5
Table S5: Overview list of detected genes and its mutations variants in prospective study
patient ID	total mutated genes	gene	location	DNA/Protein change	clinical significance of mutation	Allele frequency (%)
MS7708	9	ATM	tumor	c.743G>T/p.Arg248Leu	uncertain significance	2023-01-02
		ATM	tumor	c.5189G>T/p.Arg1730Leu	uncertain significance	2023-05-02
		SMARCB1	tumor	c.158G>T/p.Arg53Leu	conflicting interpretations of pathogenicity	2023-02-03
		BRCA1	tumor	c.3748G>T/p.Glu1250*	pathogenic	2.0
		BRCA1	tumor	c.3026C>A/p.Ser1009*	pathogenic	2023-06-02
		BRCA1	tumor	c.2138C>A/p.Ser713*	pathogenic	2023-05-02
		BRCA1	tumor	c.1352C>A/p.Ser451*	pathogenic	2023-06-02
		BRCA1	tumor	c.1214C>A/p.Ser405*	pathogenic	2023-08-02
		BRCA1	tumor	c.441G>T/p.Leu147Phe	uncertain significance	2023-03-02
		BRCA2	tumor	c.4154C>A/p.Ser1385*	pathogenic	2023-04-03
		BRCA2	tumor	c.5645C>A/p.Ser1882*	pathogenic	2023-08-02
		BRCA2	tumor	c.6058G>T/p.Glu2020*	pathogenic	2023-07-03
		BRCA2	tumor	c.1817C>A/p.Pro606Gln	uncertain significance	2023-01-03
		BRCA2	tumor	c.9155G>T/p.Arg3052Leu	uncertain significance	2023-03-02
		BRCA2	tumor	c.5344C>A/p.Gln1782Lys	conflicting interpretations of pathogenicity	2023-03-02
		FANCA	tumor	c.3316G>T/p.Glu1106*	pathogenic	2023-01-02
		MLH1	tumor	c.5C>A/p.Ser2*	pathogenic	2023-08-02
		TP53	tumor	c.1000G>T/p.Gly334Trp	likely pathogenic	2023-01-02
		TP53	tumor	c.332T>A/p.Leu111Gln	likely pathogenic	44.1
		APC	tumor	c.280C>A/p.Arg94Ser	uncertain significance	2.0
		MET	tumor	c.3119G>T/p.Arg1040Leu	uncertain significance	2023-03-02
RD6408	10	BRCA1	tumor	c.3026C>A/p.Ser1009*	pathogenic	2023-07-02
		BRCA1	tumor	c.2710G>T/p.Glu904*	pathogenic	2023-08-03
		BRCA1	tumor	c.2149G>T/p.Glu717*	pathogenic	2023-01-03
		BRCA1	tumor	c.2138C>A/p.Ser713*	pathogenic	2023-09-02
		BRCA1	tumor	c.1723G>T/p.Glu575*	pathogenic	2023-02-02
		BRCA1	tumor	c.1214C>A/p.Ser405*	pathogenic	2023-01-02
		BRCA1	tumor	c.427G>T/p.Glu143*	pathogenic	2023-06-02
		BRCA1	tumor	c.4423G>T/p.Asp1475Tyr	uncertain significance	2023-06-03
		BRCA1	tumor	c.3875C>A/p.Ser1292Tyr	uncertain significance	2023-07-02
		BRCA1	tumor	c.733G>T/p.Asp245Tyr	uncertain significance	2023-01-03
		BRCA1	tumor	c.441G>T/p.Leu147Phe	uncertain significance	2023-06-02
		BRCA2	tumor	c.7007G>T/p.Arg2336Leu	pathogenic	2023-02-03
		MLH1	tumor	c.677G>T/p.Arg226Leu	likely pathogenic	3.0
		APC	tumor	c.3827C>A/p.Ser1276*	pathogenic	2023-08-02
		APC	tumor	c.3325G>T/p.Gly1109Cys	uncertain significance	2023-02-02
		FOXL2	tumor	c.173C>A/p.Ser58*	pathogenic	2023-01-02
		PTEN	tumor	c.389G>T/p.Arg130Leu	pathogenic/likely pathogenic	2023-07-02
		PTEN	tumor	c.274G>T/p.Asp92Tyr	uncertain significance	2023-04-02
		PPARG	tumor	c.1206C>A/p.Phe402Leu	uncertain significance	2023-07-03
		PDGFRA	tumor	c.2574C>A/p.Pro858Pro	uncertain significance	2.0
		MAP2K1	tumor	c.323G>T/p.Arg108Leu	uncertain significance	2023-03-02
		MET	tumor	c.3119G>T/p.Arg1040Leu	uncertain significance	2023-02-03
MT5456	15	ATM	tumor	c.2494C>A/p.Arg832Ser	uncertain significance	2023-06-02
		ATM	tumor	c.5189G>T/p.Arg1730Leu	uncertain significance	2023-08-02
		BRCA1	tumor	c.2710G>T/p.Glu904*	pathogenic	2023-06-02
		BRCA1	tumor	c.2149G>T/p.Glu717*	pathogenic	2.0
		BRCA1	tumor	c.2138C>A/p.Ser713*	pathogenic	2023-03-02
		BRCA1	tumor	c.1214C>A/p.Ser405*	pathogenic	2023-06-02
		BRCA1	tumor	c.4423G>T/p.Asp1475Tyr	uncertain significance	2023-06-02
		BRCA1	tumor	c.3505G>T/p.Asp1169Tyr	uncertain significance	2023-08-02
		BRCA1	tumor	c.1709C>A/p.Pro570Gln	uncertain significance	2023-02-02
		BRCA1	tumor	c.121C>A/p.His41Asn	uncertain significance	2023-03-02
		BRCA2	tumor	c.818C>A/p.Ser273*	pathogenic	3.0
		BRCA2	tumor	c.1058C>A/p.Ser353*	pathogenic	2.0
		BRCA2	tumor	c.1103C>A/p.Ser368*	pathogenic	2023-02-03
		BRCA2	tumor	c.1850C>A/p.Ser617*	pathogenic	2023-08-03
		BRCA2	tumor	c.2918C>A/p.Ser973*	pathogenic	2023-02-03
		BRCA2	tumor	c.3046G>T/p.Glu1016*	pathogenic	2.0
		BRCA2	tumor	c.3191C>A/p.Ser1064*	pathogenic	2023-06-02
		BRCA2	tumor	c.3296C>A/p.Ser1099*	pathogenic	2023-05-02
		BRCA2	tumor	c.4154C>A/p.Ser1385*	pathogenic	2023-04-03
		BRCA2	tumor	c.5635G>T/p.Glu1879*	pathogenic	2023-06-02
		BRCA2	tumor	c.5645C>A/p.Ser1882*	pathogenic	2023-04-02
		BRCA2	tumor	c.5750C>A/p.Ser1917*	pathogenic	3.0
		BRCA2	tumor	c.6058G>T/p.Glu2020*	pathogenic	2023-01-05
		BRCA2	tumor	c.7090G>T/p.Glu2364*	pathogenic	2023-07-02
		BRCA2	tumor	c.9286G>T/p.Glu3096*	pathogenic	2023-08-02
		BRCA2	tumor	c.8170G>T/p.Gly2724Trp	likely pathogenic	2023-05-02
		BRCA2	tumor	c.1817C>A/p.Pro606Gln	uncertain significance	2023-05-03
		BRCA2	tumor	c.4688G>T/p.Trp1563Leu	uncertain significance	2023-04-02
		BRCA2	tumor	c.7559G>T/p.Arg2520Leu	uncertain significance	2023-06-02
		BRCA2	tumor	c.9155G>T/p.Arg3052Leu	uncertain significance	2023-08-03
		BRCA2	tumor	c.476-3C>A/ -	conflicting interpretations of pathogenicity	3.0
		BRCA2	tumor	c.4681C>A/p.His1561Asn	conflicting interpretations of pathogenicity	2023-01-02
		MLH1	tumor	c.5C>A/p.Ser2*	pathogenic	2023-05-02
		MLH1	tumor	c.1912G>T/p.Gly638*	pathogenic	2023-02-02
		MLH1	tumor	c.1976G>T/p.Arg659Leu	pathogenic	2023-02-02
		RB	tumor	c.2029G>T/p.Glu677*	pathogenic	2023-04-02
		TP53	tumor	c.973G>T/p.Gly325*	pathogenic	2023-05-03
		TP53	tumor	c.743G>A/p.Arg248Gln	pathogenic/likely pathogenic	16.0
		TP53	tumor	c.1135C>A/p.Arg379Ser	uncertain significance	2023-05-02
		VHL	tumor	c.430G>T/p.Gly144*	likely pathogenic	2023-04-03
		APC	tumor	c.3607G>T/ p.Gly1203*	likely pathogenic	2023-03-02
		APC	tumor	c.4495G>T/p.Gly1499*	likely pathogenic	2023-07-02
		FBXW7	tumor	c.1159C>A/p.Arg387Ser	likely pathogenic	2023-04-03
		PIK3R1	tumor	c.1678G>T/p.Asp560Tyr	likely pathogenic	2023-02-03
		PIK3R1	tumor	c.1528C>A/p.His510Asn	uncertain significance	2023-04-03
		IDH1	tumor	c.394C>A/p.Arg132Ser	pathogenic/likely pathogenic	3.0
		PPARG	tumor	c.1206C>A/p.Phe402Leu	uncertain significance	2023-08-02
		PDGFRA	tumor	c.2536G>T/p.Asp846Tyr	pathogenic/likely pathogenic	2023-03-02
		MAP2K1	tumor	c.323G>T/p.Arg108Leu	uncertain significance	2023-02-02
		RAF1	tumor	c.122G>T/p.Arg41Leu	uncertain significance	2023-05-02
JH5907	1	CDKN2A	tumor	c.238C>T/p.Arg80*	likely pathogenic	49.5
VU6502	2	BRCA2	tumor	c.5339C>A/p.Pro1780Gln	uncertain significance	2023-01-02
		APC	tumor	c.1039C>A/p.Gln347Lys	uncertain significance	2023-05-02
MT6601	2	STK11	tumor	c.250_252delAAG/p.Lys84del	uncertain significance	2023-07-22
		TP53	tumor	c.920-1G>T/ -	pathogenic	2023-03-30
TB6259	2	CDKN2A	tumor	c.330G>A/p.Trp110*	likely pathogenic	2023-01-14
		CDKN2A	margin	c.330G>A/p.Trp110*	likely pathogenic	2023-08-09
		TP53	tumor	c.730G>C/p.Gly244Arg	likely pathogenic	2023-06-09
		TP53	margin	c.845G>A/p.Arg282Gln	conflicting interpretations of pathogenicity	2023-09-02
		TP53	margin	c.641A>G/p.His214Arg	conflicting interpretations of pathogenicity	2023-07-08
LB4207	2	ATM	tumor	c.8558C>T/p.Thr2853Met	uncertain significance	59.6
		ATM	margin	c.8558C>T/p.Thr2853Met	uncertain significance	2.0
		TP53	tumor	c.707A>G/p.Tyr236Cys	likely pathogenic	35.9
		TP53	tumor	c.376-1G>A/ -	likely pathogenic	2023-09-28
		TP53	margin	c.707A>G/p.Tyr236Cys	likely pathogenic	2023-05-02
		TP53	margin	c.376-1G>A/ -	likely pathogenic	2023-07-02
JZ5161	2	FGFR3	tumor	c.1138G>A/p.Gly380Arg	conflicting interpretations of pathogenicity	2023-06-23
		TP53	tumor	c.637C>T/p.Arg213*	pathogenic	2023-05-20
AB7909	2	CDKN2A	tumor	c.172C>T/p.Arg58*	pathogenic	2023-07-08
		CDKN2A	tumor	c.181G>T/p.Glu61*	likely pathogenic	2023-04-10
		TP53	tumor	c.536A>G/p.His179Arg	uncertain significance	2023-03-06
JM5501	0
RK4510	1	FGFR2	tumor	c.1013G>A/p.Gly338Glu	pathogenic/likely pathogenic	2023-01-23
LL4556	1	TP53	tumor	c.797G>/ p.Gly266Glu	conflicting interpretations of pathogenicity	2023-06-03
VB5609	2	BRAF	tumor	c.2128-5_2128-4in sT/ -	conflicting interpretations of pathogenicity	43.0
		TP53	tumor	c.586C>T/p.Arg196*	pathogenic	69.4
KP3662	2	BRCA2	tumor	c.8474C>A/p.Ala2825Glu	uncertain significance	3.0
		TP53	tumor	c.742C>T/p.Arg248Trp	pathogenic	41.7
		TP53	tumor	c.981T>G/p.Tyr327*	likely pathogenic	2023-01-22
JP5006	1	PTEN	tumor	c.386G>T/p.Gly129Val	uncertain significance	2023-07-02
DL6803	1	HRAS	tumor	c.203G>A/p.Arg68Gln	uncertain significance	2023-05-14
JB5111	0
EK4806	4	HRAS	tumor	c.38G>A/p.Gly13Asp	pathogenic	2023-07-02
		SMARCB1	tumor	c.1130G>A/p.Arg377His	uncertain significance	2023-03-06
		CDKN2A	margin	c.238C>T/p.Arg80*	likely pathogenic	2023-05-13
		TP53	margin	c.845G>A/p.Arg282Gln	conflicting interpretations of pathogenicity	2023-03-04
SK5211	1	TP53	tumor	c.797G>T/p.Gly266Val	uncertain significance	2023-04-06
RS6306	1	TP53	tumor	c.577C>T/p.His193Tyr	likely pathogenic	52.3
ES3662	2	HRAS	tumor	c.35G>A/p.Gly12Asp	pathogenic	80.6
		PIK3CA	margin	c.1633G>A/p.Glu545Lys	pathogenic/likely pathogenic	2023-06-04
JM6007	1	TP53	tumor	c.375+5G>T/ -	likely pathogenic	26.0
RK7001	0
PV5559	NA
MC6107	1	TP53	tumor	c.743G>A/p.Arg248Gln	pathogenic	2023-07-28
SV4158	NA
MB3908	1	TP53	tumor	c.824G>T/p.Cys275Phe	likely pathogenic	11.0
PU5606	2	CDKN2A	tumor	c.329G>A/p.Trp110*	pathogenic	2023-02-05
		CDKN2A	tumor	c.457G>A/p.Asp153Asn	uncertain significance	2023-05-03
		TP53	tumor	c.376T>A/p.Tyr126Asn	uncertain significance	2023-01-05
		TP53	tumor	c.2174G>A/p.Arg725His	conflicting interpretations of pathogenicity	50.7
MS4354	4	ATM	tumor	c.4546C>A/p.His1516Asn	uncertain significance	2023-06-02
		BRCA1	tumor	c.1789G>T/p.Glu597*	pathogenic	2023-03-02
		BRCA1	tumor	c.1723G>T/p.Glu575*	pathogenic	2023-01-02
		TP53	tumor	c.817C>T/p.Arg273Cys	pathogenic/likely pathogenic	23.0
		TP53	tumor	c.951G>T/p.Gln317His	uncertain significance	2023-02-03
		APC	tumor	c.5098G>T/p.Ala1700Ser	uncertain significance	2023-07-02
JJ6452	0
JM5758	0
PZ6012	2	BRCA1	margin	c.3472G>T/p.Glu1158*	pathogenic	3.0
		BRCA2	margin	c.5564C>A/p.Ser1855*	pathogenic	2023-03-04
		BRCA2	margin	c.5645C>A/p.Ser1882*	pathogenic	2023-04-05
VK3959	1	TP53	margin	c.586C>T/p.Arg196*	pathogenic	2023-06-04
		TP53	margin	c.559+1G>T/-	likely pathogenic	2023-09-04
JB5910	0
MD4957	NA
LP5762	0
AP5057	3	BRCA2	tumor	c.1103C>A/p.Ser368*	pathogenic	2.0
		BRCA2	tumor	c.1832C>A/p.Ser611*	pathogenic	2023-09-02
		BRCA2	tumor	c.4022C>A/p.Ser1341*	pathogenic	2023-02-02
		BRCA2	tumor	c.6169G>T/p.Gly2057*	pathogenic	2023-03-03
		TP53	tumor	c.245delC/p.Pro82fs	pathogenic	2023-03-22
		APC	tumor	c.263G>T/p.Arg88Leu	uncertain significance	2023-05-02
VV7410	3	ATM	tumor	c.4546C>A/p.His1516Asn	uncertain significance	3.0
		ATM	tumor	c.8071C>A/p.Arg2691Ser	uncertain significance	2023-08-02
		BRCA2	tumor	c.5281G>T/ p.Gly1761*	pathogenic	2023-09-02
		BRCA2	tumor	c.8474C>A/p.Ala2825Glu	uncertain significance	2023-06-07
		KIT	tumor	c.287C>A/p.Thr96Lys	uncertain significance	3.0
VS4709	NA
LZ7452	NA
IS6560	NA
MK5412	2	BRCA2	tumor	c.5645C>A/p.Ser1882*	pathogenic	4.0
		SMADA4	tumor	c.250-4C>G/ -	uncertain significance	2023-08-02
MH6408	NA
LK6311	NA
ZK5809	NA
EZ7360	NA
JH7402	0
